# Supplementary material
Source: publisher site journal article supplement (https://www.dovepress.com/article/275400)
Supplement: Supplementary file 1 [file get_supplementary_file.php]

## Supplementary material

**NOTE: Protection of privacy will be fully implemented and complied with The People's Republic of China <Statistics Law> Chapter 3 Article 15 in relation to personal and family data collected in this survey. Any personal data collected are confidential and shall not be disclosed unless with written confirmation.**

Guidance on survey: This survey has been designed with questions in areas relating to general situation and difficulties patients diagnosed of MDR-TB in 2017 are facing during home care and isolation, in order to optimize care and improve treatment experience.

Questions are in multiple-choice format.

Please check “√” the corresponding box



# Questionnaire

## Part I General Information

1.1 Gender:  Male  Female

1.2 Date of Birth: \_\_\_\_ (Month) \_\_\_\_ (Year)

1.3 Residency:  Local  Other Province

1.4 Duration of local residency: \_\_\_\_ Year(s) \_\_\_\_ Month (s)

1.5 Occupation

- Worker  Farmer  Solider  Students  
 White Collar  Specialist  Officer  
 Unemployed  Retired  Others (Temp/part-time jobs)

1.6 Education level:

- Illiteracy  Primary School  Junior High  
 Senior High  College / University or above

1.7 Marital status:

- Single  Married  Divorced  Widowed

1.8 Medical cost / insurance coverage:

- All out-of-pocket  
 New Rural Co-operative Medical Scheme  
 Urban Employee Basic Medical Insurance  
 Urban Residents Basic Medical Insurance  
 Commercial Insurance

## Part 2 Clinical Findings

2.1 Date of MDR-TB diagnosis: \_\_\_\_ (Day) \_\_\_\_ (Month) \_\_\_\_ (Year)

2.2 Date of MDR-TB treatment initiation: \_\_\_\_ (Day) \_\_\_\_ (Month) \_\_\_\_ (Year)

2.3 Result of Sputum smear when confirmed diagnosis

- + ++ +++ ++++

2.4 Hospitalized on first MDR-TB diagnosis:

Yes  No. Go to Question 3.1

2.4.1 Result of Sputum smear before discharge

Not tested yet - + ++ +++ ++++

2.4.2 Days of hospitalization: \_\_\_\_ Days

## Part 3/ Health-related habits / behavior

3.1 Tobacco smoking:  Yes  No

Quit smoking after MDR-TB diagnosis:  Yes  No

3.2 Alcohol Drinking:  Yes  No

Quit drinking after MDR-TB diagnosis:  Yes  No

- Definition of Smoking: Smoked more than 10 cigarettes in the past week.
- Definition of Quit Smoking: Smoked less than 10 cigarettes in the previous week.
- Definition of Alcohol Drinking: Alcohol more than 10 gram in the past week.
- Definition of Quit Drinking: Alcohol less than 10 gram in the past week.

One serving of alcoholic drink-equivalent totals as:

- 12 ounces of beer (containing an average percentage of 5% alcohol).
- 5 ounces of wine (containing an average percentage of 12% alcohol).
- 1.5 fluid ounces of 80-proof distilled spirits (containing an average percentage of around 40% alcohol).

## Part 4/ Home Care and isolation

4.1 Have you or your household members been briefed by medical staff on the guidelines of home quarantine

- Yes  No

4.2 Do you or your household members know how long does your home quarantine lasts?

- Yes  No

4.3 Do you still go to work after confirmed diagnosis of MDR-TB?

- Yes  No (retired, unemployed and students check this box)

When did you return to work? (IF answer is YES above)

- never stop working  
 After discharge  
 After finishing home quarantine

Reasons for continuing to go to work (IF answer is YES above)

- Do not want others to find out your illness  
 I am a bread earner for the family  
 Others (pls state) \_\_\_\_\_

4.4 Does your family have income after your MDR-TB diagnosis?

- Yes (please choose  income from other household members  
 Social subsidy

- No

4.5 Are you worried about the infectiousness of your disease?

- Yes  No

4.6 Your current housing conditions. Are you residing with other household members?

- I live alone  
 I live with my family  
 I live in a quarter provided by my employer  
 I live in a shared apartment

4.7 How many household members do you share your residential with before diagnosis of MDR-TB?

- 0 (live alone)  1 person  2 persons  more than 2 persons

4.8 Do you have your own room after being diagnosed with MDR-TB?

- Yes  No

4.9 Do you consider your room well-ventilated?

- Yes  No

4.10 Does your room provide suitable ventilation conditions?

- Yes (please choose  Fan  Air-conditioning  Air purifier)  
 No

4.11 Did you handle your sputum properly?

- No sputum production  
 No  
 Yes (please choose  wrapped with a tissue paper and threw in trash

- coughed it into the toilet basin and flushed it
- 4.12 Who takes care of your everyday meals during your home quarantine period?
- Cooked by myself
  - Cooked by household members
  - Ordered food delivery service
- 4.13 Did you go out during the home-quarantine period?
- Yes    No (Go to question 4.17)
- 4.14 Did you wear a mask when you go out?       Yes    No
- 4.15 Did you bring pocket tissue paper / napkins with you when you go out to handle your sputum properly?       Yes    No
- 4.16 What time did you usually go out?
- Morning       Noon    Evening or at night
- Places you visited when you go out?
- Place of work    Supermarket    Restaurants
  - Others (please specify) \_\_\_\_\_
- How long did you usually go out?
- <1hr       1-2hrs       > 2hrs
- 4.17 Did you take your medications on time after discharge?
- Yes    No
- 4.18 Who reminded you on taking your medications on time?
- myself
  - family members
  - my attending clinician
  - Public health personnel from community care
- 4.19 Was injection in your treatment regimen?
- Yes    No (Go to question 4.23)
- 4.20 Where did you get your injection?
- Private clinics       Community center
  - Designated TB-treatment hospital       Others (pls specify) \_\_\_\_\_
- 4.21 How do you get to the injection place?
- On foot       Cycling       Drive       Public transport
- 4.22 How long did it take to get to the injection place from home?
- < 0.5hr    > 0.5hr
- 4.23 Did you attend the follow-up checks as scheduled?
- Yes    No
- 4.24 Proximity of the follow-up centers from your home?
- < 10km    >10km
- 4.25 How did you get to the place for your follow-up checks?
- On foot       Drive       Public transport       Taxi       Trains
  - Airplanes
- 4.26 Are you confident that you can fully recovered from MDR-TB?
- Yes    No
- 4.27 What was the biggest difficulty you faced during home-quarantine?
- Repulsiveness to injections       Adverse drug reactions

- Financial hardship
- Psychological stress
- Inconvenience in attending follow-up visits

4.28 What kind of help would you prefer?

- Free drugs
- Financial support
- Others (please specify) \_\_\_\_\_

4.29 Would you be willing to participate if the Government implements free hospitalization until treatment + quarantine completion?

- Yes
- No

4.30 What is your current monthly out-of-pocket expenses on treating MDR-TB?

- < CNY1000
- CNY1000-2000
- > CNY2000

This is the end of the questionnaire. Thank you very much for your time and cooperation!

Date of questionnaire:

Name & Signature of the interviewing clinician:

Checked and approved by:
